# Supplementary material for: Prevalence and determinants of post-tuberculosis lung disease in Sub-Saharan Africa: A systematic review and meta-analysis
Source: Research Square preprint supplement (doi:10.21203/rs.3.rs-6727961/v1), 2025-06-09
Supplement: Supplementary file 1 [file 409565e00c7bf566cbca627f.docx]

Search strategy

Embase = 2217

((('estimate'/exp OR 'approximate' OR 'calculate' OR 'compute' OR 'determine'/exp OR 'evaluate' OR 'quantify' OR 'assess' OR 'measure') AND 'prevalence'/exp OR 'Magnitude'/exp OR 'incidence'/exp OR 'occurrence' OR 'extent' OR 'frequency'/exp) AND 'post tuberculosis' OR 'post tb' OR 'post pulmonary tuberculosis' OR 'post infectious pulmonary tb sequelae' OR 'pulmonary tuberculosis sequelae' OR 'tuberculosis sequelae' OR 'intrathoracic tb') AND 'lung disease'/exp OR 'lung sequelae' OR 'chronic lung disease'/exp OR 'lung dysfunction'/exp OR 'restrictive lung disease'/exp OR 'lung function impairment'/exp OR 'lung fibrosis'/exp OR 'interstitial lung disease'/exp OR 'cavitation abnormal spirometry' OR 'airflow obstruction bronchiectasis' OR 'chronic obstructive lung disease'/exp OR 'bronchiolitis obliterans'/exp OR 'aspergillosis'/exp OR 'obstructive lung disease'/exp OR 'residual damage sequelae' OR 'abnormal pulmonary function' OR 'lung impairment' OR 'impaired lung function' OR 'abnormal spirometry' OR 'spirometry airflow obstruction' OR 'lung injury'/exp OR 'chronic bronchitis'/exp OR 'lung cavitation, cavities'

AND

'angola'/exp OR 'benin'/exp OR 'botswana'/exp OR 'burkina faso'/exp OR 'burundi'/exp OR 'cape verde'/exp OR 'cameroon'/exp OR 'central african republic'/exp OR 'chad'/exp OR 'comoros'/exp OR 'democratic republic congo'/exp OR 'congo'/exp OR 'cote d`ivoire'/exp OR 'equatorial guinea'/exp OR 'eritrea'/exp OR 'eswatini'/exp OR 'ethiopia'/exp OR 'gabon'/exp OR 'gambia'/exp OR 'ghana'/exp OR 'guinea'/exp OR 'guinea-bissau'/exp OR 'kenya'/exp OR 'lesotho'/exp OR 'liberia'/exp OR 'madagascar'/exp OR 'malawi'/exp OR 'mali'/exp OR 'mauritania'/exp OR 'mauritius'/exp OR 'mozambique'/exp OR 'namibia'/exp OR 'niger'/exp OR 'nigeria'/exp OR 'rwanda'/exp OR 'sao tome and principe'/exp OR 'senegal'/exp OR 'seychelles'/exp OR 'sierra leone'/exp OR 'somalia'/exp OR 'south africa'/exp OR 'south sudan'/exp OR 'sudan'/exp OR 'tanzania'/exp OR 'togo'/exp OR 'uganda'/exp OR 'zambia'/exp OR 'zimbabwe'/exp

PubMed =219

(((Estimate OR Approximate OR Calculate OR Compute OR Determine OR Evaluate OR Quantify OR Assess OR Measure[MeSH Terms]) AND (Magnitude OR Prevalence OR Incidence OR Occurrence OR Extent OR Frequency[MeSH Terms])) AND ((Post Tuberculosis OR Post TB OR Post pulmonary tuberculosis OR Post infectious Pulmonary TB sequelae OR Pulmonary tuberculosis sequelae OR Tuberculosis sequelae OR Intrathoracic TB[MeSH Terms]) AND (Lung disease OR Lung sequelae OR Chronic lung disease OR Lung dysfunction OR Lung injury OR Restrictive lung disease OR Lung function impairment OR Lung fibrosis OR Interstitial lung disease OR Cavitation Abnormal spirometry OR Airflow obstruction Bronchiectasis OR Chronic obstructive pulmonary disease OR COPD OR Bronchiolitis obliterans OR Obliterative bronchiolitis OR Aspergillosis OR Obstructive lung disease OR Residual damage Sequelae OR Abnormal pulmonary function OR Lung impairment OR Impaired lung function OR Abnormal spirometry OR Spirometry Airflow obstruction OR Lung damage OR Chronic bronchitis OR Lung cavitation, cavities[MeSH Terms]))) AND (Angola*[tw] OR Benin*[tw] OR Botswana*[tw] or Burkina Faso*[tw] or Burundi*[tw] or Cabo Verde*[tw] or Cameroon*[tw] or Central African Republic*[tw] or Chad*[tw] or Comoros*[tw] or Congo, Democratic Republic of*[tw] or Congo, Republic of*[tw] or Cote d'Ivoire*[tw] or Equatorial Guinea*[tw] or Eritrea*[tw] or Eswatini*[tw] or Ethiopia*[tw] or Gabon*[tw] or Gambia*[tw] or Ghana*[tw] or Guinea*[tw] or Guinea-Bissau*[tw] or Kenya*[tw] or Lesotho*[tw] or Liberia*[tw] or Madagascar*[tw] or Malawi*[tw] or Mali*[tw] or Mauritania*[tw] or Mauritius*[tw] or Mozambique*[tw] or Namibia*[tw] or Niger*[tw] or Nigeria*[tw] or Rwanda*[tw] or Sao Tome and Principe*[tw] or Senegal*[tw] or Seychelles*[tw] or Sierra Leone*[tw] or Somalia*[tw] South Africa*[tw] South Sudan*[tw] or Sudan*[tw] or Tanzania*[tw] or Togo*[tw] or Uganda*[tw] or Zambia*[tw] or Zimbabwe*[tw])
