# Supplementary material for: Prevalence and determinants of post-tuberculosis lung disease in Sub-Saharan Africa: A systematic review and meta-analysis
Source: Research Square preprint supplement (doi:10.21203/rs.3.rs-6727961/v1), 2025-06-09
Supplement: Supplementary file 2 [file 63d93d98ad8c5e40e1a97e06.xlsx]

## Sheet: Table 1
No.ID	First Author (Year)	Country	WHO Region	Urbanization	Setting	Study Design	Sample	Prior_TB_Definition	PTLD_Definitiona	Age_included	Age_Group	mean_age_Median	SD_IQR	F/m	Quality_Score
1	Nkereuwem (2024)	Gambia	Africa	Urban	TB research clinic	Crossectional analysis	79	Bacteriologically confirmed or clinically diagnosed pTB	Chronic respiratory impairment from symptoms, CXR, and spirometry	<20	children and adults	15.6	3.8	41/38	9
2	van der Zalm (2024)	southe africa	Africa	Urban	Community	Prospective, longitudinal, observational study	37	Microbiologically confirmed PTB	Abnormal spirometry, plethysmography or diffusion capacity,	10-19	Adolescents	14.9	2.7	47/100	9
3	Nkereuwem (2022)	Gambia	Africa	Urban	Child TB clinic	Crossectional comparative	68	Confirmed or unconfirmed PTB	NR	<15	N/A	8.9	3.5	32/36	1
4	Auld (2021)	South Africa	African	Urban	Hospital	Prospective cohort	92	Bact	Spiro, clin	>18	Adults	36	5	57/77	5
5	Ddungu (2021)	Uganda	African	Urban	Hospital	Cross-sectional	72	NR	Spiro, clin	>30	Adults	45	1	173/106	7
6	Mpagama (2021)	Tanzania	African	Mixed	Hospital	Cross-sectional	219	Bact	Spiro, clin	>18	Adults	45	10	26/193	8
7	Kayongo (2020)	Uganda	African	Rural	Hospital	Cross-sectional	66	NR	Spiro, clin	>35	Adults	48	0	17/28	8
8	Meghji (2020)	Malawi	African	Urban	Hospital	Prospective cohort	405	Clin, bact, radiol	Spiro, clin, radiol	>15	Adolescents, adults	35	7	275/405	7
9	Khosa (2020)	Mozambique	African	Urban	Hospital	Prospective cohort	62	Bact	Spiro	>18	Adults	29	4.5	20/42	9
10	Van Kampen (2019)	Uganda	African	Mixed	Community	Cross-sectional	798	NR	Clin, radiol	>15	Adolescents, adults	NR	NR	376/422	9
11	Chin (2019)	Zimbabwe	African	Urban	Hospital	Prospective cohort	175	Clin, bact	Spiro, clin, radiol	NR	Adults	41	8	83/92	6
12	Fiogbe (2019)	Benin	African	Urban	Hospital	Cross-sectional	189	Clin, bact, radiol	Spiro, clin	>18	Adults	37	7	61/128	9
13	Osman (2019)	South Africa	African	Urban	Hospital	Cross-sectional	51	Bact	Clin	>18	Adults	40	9	91/165	9
14	Attia (2018)	Kenya	African	Urban	Hospital	Cross-sectional	96	NR	Spiro, radiol	>10–19	Adolescents, adults	39	6	57/28	6
15	Katoto (2018)	DR Congo	African	Rural	Community	Cross-sectional	441	NR	Clin	>15	Adolescents, adults	44.6	14.9	143/171	7
16	Magitta (2018)	Tanzania	African	Rural	Community	Cross-sectional	18	NR	Spiro, clin	>35	Adults	51.8	10	233/263	8
17	North (2018)	Uganda	African	Rural	Hospital	Cross-sectional	18	NR	Spiro, clin	>40	Adults	52	4	144/125	6
18	Mbanchou (2016)	Cameroon	African	Urban	Hospital	Cross-sectional	269	Clin, bact, radiol	Spiro	>15	Adolescents, adults	34.2	9.07	123/146	9
19	Manji(2016)	Tanzania	Africa	Urban	TB clinic	Cross-sectional	501	Bacteriologically confirmed or clinically diagnosed pTB	Spiro,clinical	>18	Adults	40	NR	198/303	9
20	Akanbi (2015)	Nigeria	African	Urban	Hospital	Cross-sectional	82	NR	Spiro, clin	>30	Adults	44.5	7.1	NR	6
21	Binegdie (2015)	Ethiopia	African	Urban	Hospital	Cross-sectional	725	Radiol	Radiol	>12	Adults	40	0	NR	6
							4463
	aClin = clinical assessment, Bact = bacteriologic, Radiol = radiologic, Spiro = spirometry. NR = not reported

## Sheet: Table 2
S.No.	Author_year	PTLD n/N	PTLD prevalence	95%CI	Spirometric finding n/N	Prevalence_Spiro	95%CI--for spirometry	respsmptm n/N	Symptom_Prevalence	95%CI	radio n/N	Radio_Prevalence	95%CI	OR_female	95%CI for OR	OR_Smoking	95%CI_for OR	OR_for_HIV+Ve	95%CI_for OR	OR_for_UW	95%CI_for_OR_UW	OR for FP	95%CI for OR_FP	OR for Couph	95%CI for OR
2	Nkereuwem (2024)	40/79	51	39.8-62.02	40/79	51	39.98-62.02	28/79	35.4	24.9-45.9	38/79	47.4	36.4-58.4	2.14	0.87–5.29	NR	NR	NR	NR	1.26	0.6-2.66	3.52	1.14-10.83	1.74	0.61-4.94
1	van der Zalm (2024)	33/50	65	51.77-78.23	NR	NR	NR	24/50	48	34.1-68.9	37/50	74	61.8-86.2	NR	NR	NR	NR	NR	NR	NR	NR	NR	NR	NR	NR
3	Nkereuwem (2023)	26/68	38.5	26.69-50.06	52/68	76.5	66.4-86.57	35/68	51.5	39.6-63.4	NR	NR	NR	1.49	0.79–2.83	2.28	0.61-2.28	NR	NR	4.55	1.36-15.18	NR	NR	1.59	0.78-3.26
4	Auld (2021)	30/92	32.61	23.0-42.2	30/92	32.61	23.0-42.2	12/93	12.9	6.1-19.7	NR	NR	NR	NR	NR	NR	NR	NR	NR	NR	NR	NR	NR	NR	NR
5	Ddungu (2021)	7/72	9.72	2.9-16.6	NR	NR	NR	26/72	36.11	25.0-47.2	NR	NR	NR	NR	NR	NR	NR	NR	NR	NR	NR	NR	NR	NR	NR
6	Mpagama (2021)	146/219	66.67	60.4-72.9	146/219	66.67	60.4-72.9	98/219	44.75	38.2-51.3	177/219	80.82	75.6-86.0	NR	NR	4.24	1.45-1.42	0.58	0.27–1.25	NR	NR	NR	NR	NR	NR
7	Kayongo (2020)	14/66	21.21	11.3-31.1	14/66	21.21	11.3-31.1	NR	NR	NR	NR	NR	NR	NR	NR	NR	NR	NR	NR	NR	NR	NR	NR	NR	NR
8	Meghji (2020)	246/405	34.25	29.4-39.1	125/365	34.25	29.4-39.1	246/405	60.74	56.0-65.5	NR	NR	NR	NR	NR	NR	NR	NR	NR	NR	NR	NR	NR	NR	NR
9	Khosa (2020)	40/62	64.52	52.6-76.4	40/62	64.52	52.6-76.4	NR	NR	NR	NR	NR	NR	5.15	1.31–20.23	NR	NR	NR	NR	NR	NR	NR	NR	NR	NR
11	Van Kampen (2019)	326/798	40.85	37.4-44.3	NR	NR	NR	124/798	15.54	13.0-18.1	326/798	40.85	37.6-44.5	NR	NR	NR	NR	NR	NR	NR	NR	NR	NR	NR	NR
12	Chin (2019)	58/162	35.8	28.4-43.2	58/162	35.8	28.4-43.2	59/175	33.52	26.5-40.5	96/116	82.76	75.9-89.6	NR	NR	NR	NR	NR	NR	NR	NR	NR	NR	NR	NR
13	Fiogbe (2019)	85/189	44.97	37.9-52.1	85/189	44.97	37.9-52.1	NR	NR	NR	NR	NR	NR	2.1	1.13–3.90	NR	NR	1.25	0.59–2.71	NR	NR	NR	NR	NR	NR
14	Osman (2019)	28/51	54.9	41.2-68.6	NR	NR	NR	28/51	54.9	41.2-68.6	NR	NR	NR	NR	NR	NR	NR	NR	NR	NR	NR	NR	NR	NR	NR
15	Attia (2018)	35/96	36.46	26.8-46.1	35/96	36.46	26.8-46.1	52/96	54.17	44.2-64.1	NR	NR	NR	1.14	0.69–1.89	NR	NR	NR	NR	NR	NR	NR	NR	NR	NR
16	Katoto (2018)	247/441	56.01	51.4-60.6	NR	NR	NR	247/441	56.01	51.4-60.6	NR	NR	NR	NR	NR	NR	NR	NR	NR	NR	NR	NR	NR	NR	NR
17	Magitta (2018)	9/18	50	26.9-73.1	9/18	50	26.9-73.1	NR	NR	NR	NR	NR	NR	NR	NR	NR	NR	NR	NR	NR	NR	NR	NR	NR	NR
10	North (2018)	6/18	33.33	11.6-55.1	6/18	33.33	11.6-55.1	NR	NR	NR	NR	NR	NR	NR	NR	NR	NR	NR	NR	NR	NR	NR	NR	NR	NR
18	Mbanchou (2016)	122/269	45.35	39.4-51.3	122/269	45.35	39.4-51.3	NR	NR	NR	NR	NR	NR	1.29	62/84	NR	NR	0.92	0.49–1.73	NR	NR	4.22	1.73-10.29	2.08	0.72-6.1
19	Manji(2016)	371/501	74	70.2-77.9	323/501	64.5	60.3-68.7	NR	NR	NR	NR	NR	NR	NR	NR	1.45	0.92-2.3	0.61	0.4–0.93	NR	NR	NR	NR	NR	NR
20	Akanbi (2015)	15/82	18.29	9.9-26.7	15/82	18.29	9.9-26.7	NR	NR	NR	NR	NR	NR	NR	NR	NR	NR	NR	NR	NR	NR	NR	NR	NR	NR
21	Binegdie (2015)	134/725	18.48	15.7-21.3	NR	NR	NR	NR	NR	NR	134/725	18.48	15.7-21.3	NR	NR	NR	NR	NR	NR	NR	NR	NR	NR	NR	NR
Radiol = radiologic, Spiro = spirometry. NR = not reported, n=case, N=sample, OR=odds ratio, FP=Fibrotic patern, CI=Confidence interval
