# Supplementary material for: Prevalence and determinants of post-tuberculosis lung disease in Sub-Saharan Africa: A systematic review and meta-analysis
Source: Research Square preprint supplement (doi:10.21203/rs.3.rs-6727961/v1), 2025-06-09
Supplement: Supplementary file 3 [file 81b6ed07581a4519fa6fb2ed.xlsx]

## Sheet: PTLD prevalence
index	author_year	Year	Case	Total_sample	Prevalence_PTLD	95%__CI_prevalence_PTLD	margin_of_error_prevalence	LCI_prevalence	UCI_prevalence	Case_spiro_freq	Total_spirometry_sample	spiro_prevalence	margin_of error_spiro	lower_ci	upper_ci_	95_ci_for_prevalence...16	n_resp_symptoms	resp_symptoms_freq	resp_symptoms_prevalence	margin_of_error...20	lower_ci_95	upper_ci_95...22	95_ci_for_prevalence...23	n_radiology_sample	abn_radiol_freq	abn_radiol_prevalence	margin_of_error...27	lower_ci_95...28	upper_ci_95...29	95_ci_for_prevalence...30
1	Nkereuwem (2024)	2024	40	79	51	39.8-62.02	11.11	39.98	62.02	40	79	51	11.11	39.98	62.02	39.98-62.02	79	28	35.4		24.9	45.9	24.9-45.9	79	38	47.4		36.4	58.4	36.4-58.4
2	van der Zalm (2024)	2024	24	37	65	51.77-78.23	13.23	51.77	78.23								50	24	48		34.1	68.9	34.1-68.9	50	37	74		61.8	86.2	61.8-86.2
3	Nkereuwem (2023)	2023	26	68	38.5	26.69-50.06	11.69	26.69	50.06	52	68	76.5	10.085	66.4	86.57	66.4-86.57	68	35	51.5		39.6	63.4	39.6-63.4
4	Auld (2021)	2021	30	92	32.61	23.0-42.2	9.58	23.03	42.19	30	92	32.61	9.58	23.03	42.19	23.0-42.2	93	12	12.9	6.81	6.09	19.72	6.1-19.7
5	Ddungu (2021)	2021	7	72	9.72	2.9-16.6	6.84	2.88	16.57								72	26	36.11	11.09	25.02	47.21	25.0-47.2
6	Mpagama (2021)	2021	146	219	66.67	60.4-72.9	6.24	60.42	72.91	146	219	66.67	6.24	60.42	72.91	60.4-72.9	219	98	44.75	6.59	38.16	51.33	38.2-51.3	219	177	80.82	5.21	75.61	86.04	75.6-86.0
7	Kayongo (2020)	2020	14	66	21.21	11.3-31.1	9.86	11.35	31.08	14	66	21.21	9.86	11.35	31.08	11.3-31.1
9	Meghji (2020)	2020	125	365	34.25	29.4-39.1	4.87	29.38	39.11	125	365	34.25	4.87	29.38	39.11	29.4-39.1	405	246	60.74	4.76	55.98	65.5	56.0-65.5
8	Khosa (2020)	2020	40	62	64.52	52.6-76.4	11.91	52.61	76.43	40	62	64.52	11.91	52.61	76.43	52.6-76.4
13	Van Kampen (2019)	2019	326	798	40.85	37.4-44.3	3.41	37.44	44.26								798	124	15.54	2.51	13.03	18.05	13.0-18.1	798	326	40.85	3.41	37.44	44.26	37.6-44.5
10	Chin (2019)	2019	58	162	35.8	28.4-43.2	7.38	28.42	43.19	58	162	35.8	7.38	28.42	43.19	28.4-43.2	176	59	33.52	6.97	26.55	40.5	26.5-40.5	116	96	82.76	6.87	75.88	89.63	75.9-89.6
11	Fiogbe A (2019)	2019	85	189	44.97	37.9-52.1	7.09	37.88	52.07	85	189	44.97	7.09	37.88	52.07	37.9-52.1
12	Osman (2019)	2019	28	51	54.9	41.2-68.6	13.66	41.25	68.56								51	28	54.9	13.66	41.25	68.56	41.2-68.6
14	Attia (2018)	2018	35	96	36.46	26.8-46.1	9.63	26.83	46.09	35	96	36.46	9.63	26.83	46.09	26.8-46.1	96	52	54.17	9.97	44.2	64.13	44.2-64.1
15	Katoto (2018)	2018	247	441	56.01	51.4-60.6	4.63	51.38	60.64								441	247	56.01	4.63	51.38	60.64	51.4-60.6
16	Magitta (2018)	2018	9	18	50	26.9-73.1	23.1	26.9	73.1	9	18	50	23.1	26.9	73.1	26.9-73.1
17	North (2018)	2018	6	18	33.33	11.6-55.1	21.78	11.56	55.11	6	18	33.33	21.78	11.56	55.11	11.6-55.1
18	Mbanchou (2016)	2016	122	269	45.35	39.4-51.3	5.95	39.4	51.3	122	269	45.35	5.95	39.4	51.3	39.4-51.3
19	Manji (2016)	2016	371	501	74	70.2-77.9	3.9	70.2	77.9	323	501	64.5		60.3	68.7	60.3-68.7
20	Akanbi (2015)	2015	15	82	18.29	9.9-26.7	8.37	9.92	26.66	15	82	18.29	8.37	9.92	26.66	9.9-26.7
21	Binegdie (2015)	2015	134	725	18.48	15.7-21.3	2.83	15.66	21.31															725	134	18.48	2.83	15.66	21.31	15.7-21.3

## Sheet: Gender odds Ratio
ID	Author_year		F_ PTLD	F_No_PTLD	M _PTLD	M_No_PTLD	OR_being_female	LCI	UCI	95%CI
1	Nkereuwem (2024)	Gambia	27	14	18	20	2.14	0.87	5.29	0.87–5.29
3	Nkereuwem (2022)	Gambia	32	34	36	57	1.49	0.79	2.83	0.79–2.83
	Mbatchou Ngahane (2016)	Cameroon	60	63	62	84	1.29	0.8	2.09	0.80–2.09
	Khosa (2020)	Mozambique	17	3	22	20	5.15	1.31	20.23	1.31–20.23
	Fiogbe A (2019)	Bennin	35	26	50	78	2.1	1.13	3.9	1.13–3.90
	Attia (2018)	Kenya	57	219	28	123	1.14	0.69	1.89	0.69–1.89

## Sheet: Cigaratte smoking OR
ID	Author_year	Country	Smoker_PTLD	Smoker_NoPTLD	Non-SmokerPTLD	Non-Smoker_NoPTLD	OR	LCI	UCI	95%CI
	Nkereuwem (2023)	Gambia	25	43	30	61	1.18	0.61	2.28	0.61-2.28
	Mpagama (2021)	Tanzania	55	48	37	79	2.45	1.42	4.24	1.45-1.42
	Manji(2016)	Tanzania	116	31	255	99	1.45	0.92	2.3	0.92-2.3

## Sheet: Underwieght 
ID	Author_year	Country	Underweight with PTLD	Underwight with out PTLD	Normal wieght with PTLD	Normal with out PTLD	OR for Underwieght	LCI	UCI	95%CI
1	Nkereuwem (2022)	Gambia	17	51	19	72	1.26	0.6	2.66	0.6-2.66
3	Nkereuwem (2024)	Gambia	17	4	28	30	4.55	1.36	15.18	1.36-15.18

## Sheet: Fibrotic Pattern 
ID	Author_year	Country	Fibrosis_ with_ PTLD	Fibrosis_with_ no_PTLD	PTLD _with _out PTLD	No_fibroisis_No_PTLD	OR	LCI	UCI	95%CI
	Mbatchou Ngahane (2016)	Cameroon	22	45	8	69	4.22	1.73	10.29	1.73-10.29
	Nkereuwem (2024)	Gambia	17	28	5	29	3.52	1.14	10.83	1.14-10.83

## Sheet: Post-TB treatment Couph 
ID	Author_year	Country	Couph with PTLD	Couph with out PTLD	PTLD with out couph	No Couph and PTLD	OR for Couph	LCI	UCI	95%CI
	Mbatchou Ngahane (2016)	Cameroon	117	135	5	12	2.08	0.72	6.1	0.72-6.1
3	Nkereuwem (2022)	Gambia	21	47	20	71	1.59	0.78	3.26	0.78-3.26
1	Nkereuwem (2024)	Gambia	14	7	31	27	1.74	0.61	4.94	0.61-4.94

## Sheet: HIV
Author_year	Country	HIV+_yes	HIV+ve_No_PTLD	HIV-ve_yes_PTLD	HIV-Ve No_PTLD	OR_Underweight	LCI	UCI	95%CI
Mbanchou (2016)	Cameroon	21	27	101	120	0.92	0.49	1.73	0.49–1.73
Fiogbe A (2019)	Bennin	19	51	16	54	1.26	0.59	2.71	0.59–2.71
Mpagama (2021)	Tanzania	11	24	81	103	0.58	0.27	1.25	0.27–1.25
Manji(2016)	Tanzania	102	50	269	80	0.61	0.4	0.93	0.4–0.93
HIV+_Yes= HIV positive with post TB lung disease, HIV+_NO_PTLD= HIV positive without post TB lung disease, HIV-Ve_Yes_PTLD= HIV negative with Post TB lung disease, HIV-Ve _NO_PTLD= Both HIVand PTLD negative
